# Supplementary material for: Wine Barrel Biofilm as a Source of Yeasts with Non-Conventional Properties
Source: MDPI journal article supplement (doi:10.3390/microorganisms12050880), 2024-04-27
Supplement: s1 [file s1]

Supplementary Table S1. Yeast species detected in the different samples

| Strain | Species                   | Origin | Accession number | Similarity (%) |
|--------|---------------------------|--------|------------------|----------------|
| S1     |                           |        |                  |                |
| S10    |                           |        |                  |                |
| S2     | <i>M. farinosa</i>        |        | FN565484         |                |
| S9     |                           | 1890   |                  |                |
| S4     |                           |        |                  |                |
| S19    |                           |        |                  |                |
| S39    | <i>Z. bisporus</i>        |        | AF399790         |                |
| S31    | <i>M. farinosa</i>        |        | FN565484         |                |
| S32    | <i>Z. bisporus</i>        | 1895   | AF399790         |                |
| S21    |                           |        | NG058447         |                |
| S24    | <i>Z. bisporus</i>        |        | EF460531         |                |
| S25    |                           |        | AY046115         |                |
| S22    | <i>W. versatilis</i>      | 1920   | KY106880         |                |
| S23    | <i>S. lactis-condensi</i> |        | KY106546         | 100            |
| S30    | <i>Z. rouxii</i>          |        | KY110285         |                |
| S29    | <i>S. lactis-condensi</i> |        | KY106546         |                |
| S40    | <i>Z. bailii</i>          |        | KY110241         |                |
| S26    | <i>W. versatilis</i>      | 1975   | KY106880         |                |
| S28    | <i>Z. bisporus</i>        |        | AF399790         |                |
| S27    | <i>Z. bisporus</i>        |        | AY046115         |                |
| S33    | <i>Z. bailii</i>          |        | KY110241         |                |
| S35    | <i>Z. bailii</i>          |        |                  |                |
| S36    |                           | 2008   |                  |                |
| S6     |                           |        |                  |                |
| S8     | <i>M. farinosa</i>        |        | FN565484         |                |
| S5     |                           |        |                  |                |

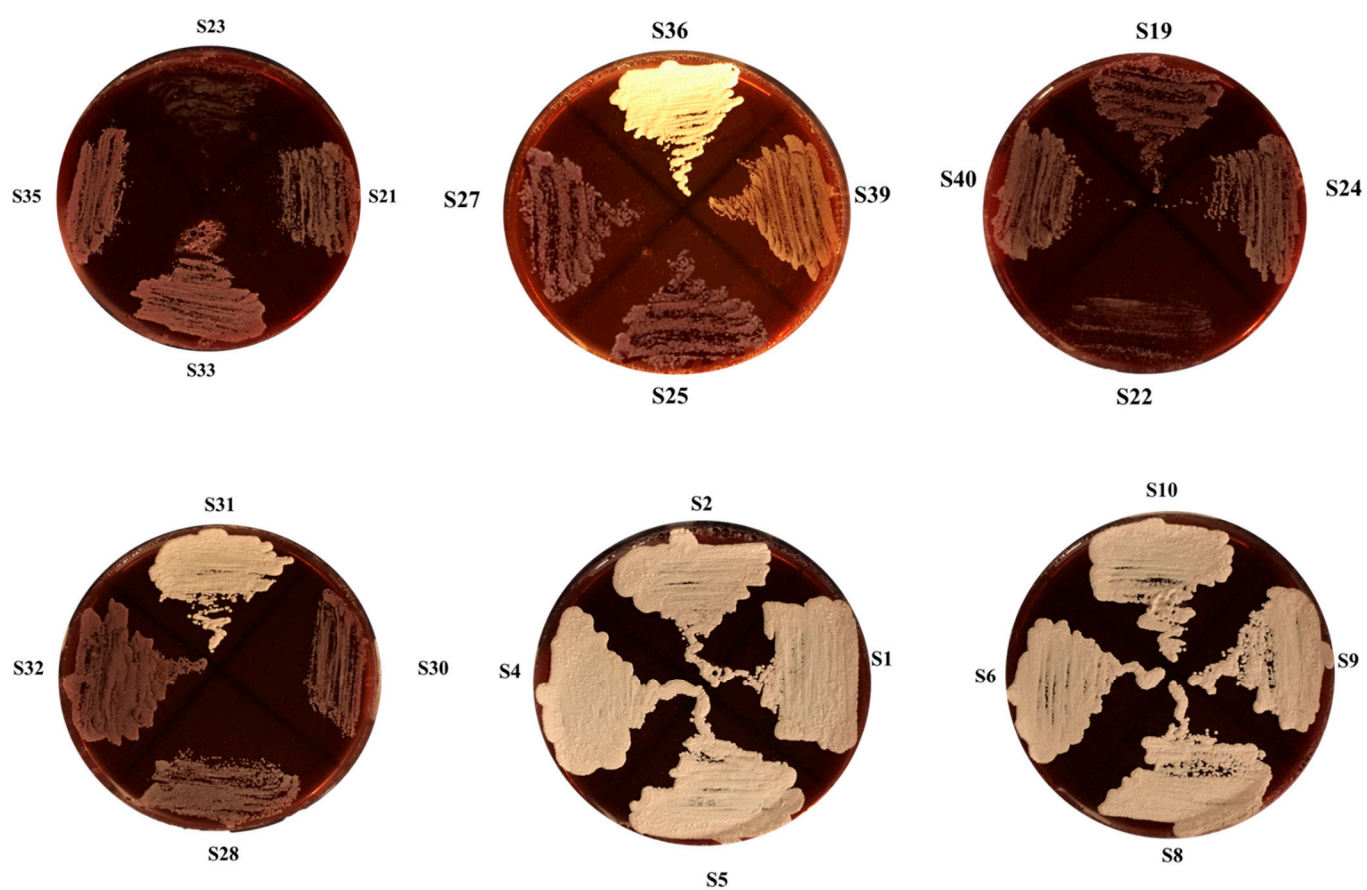

Supplementary Figure S1. Anthocyanins adsorption by yeast cell walls
